# Supplementary material for: Pine nut antioxidant peptides ameliorate the memory impairment in a scopolamine-induced mouse model via SIRT3-induced synaptic plasticity
Source: Royal Society of Chemistry journal article supplement (doi:10.1039/d1fo01817e), 2021-01-01
Supplement: d1fo01817e1.pdf [file d1fo01817e1.pdf]

## 1 Supplementary information

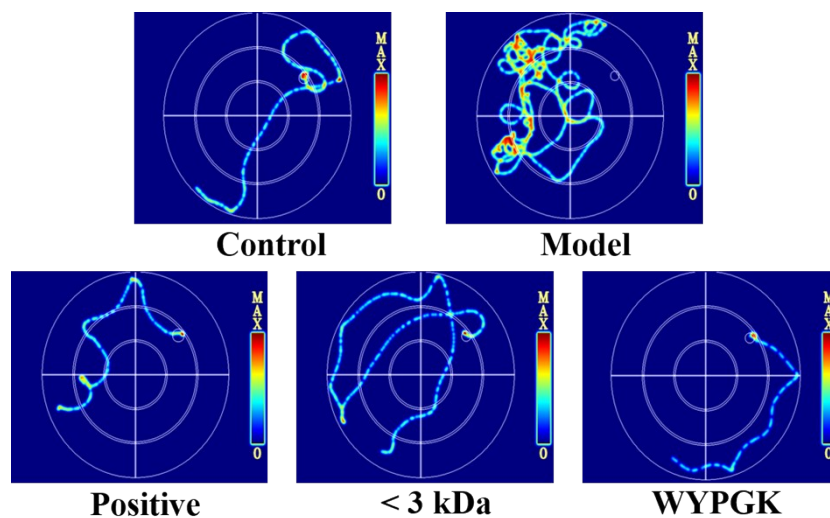

2

3

(A)

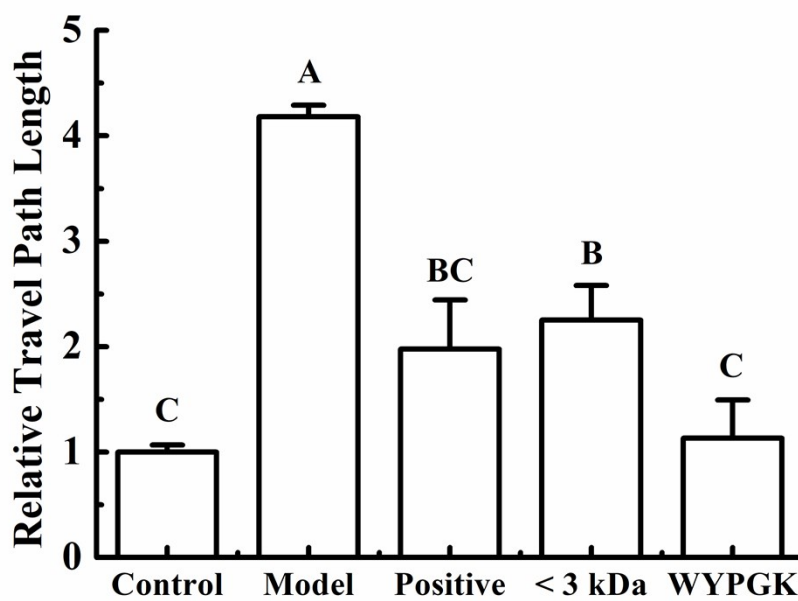

4

5

(B)

6 **Figure S1.** Morris water maze test. (A) The travel path of hidden platform. (B) Mice  
7 of travel path length to find platform, N =10. Different letters denote significant  
8 statistical differences ( $P < 0.01$ ).

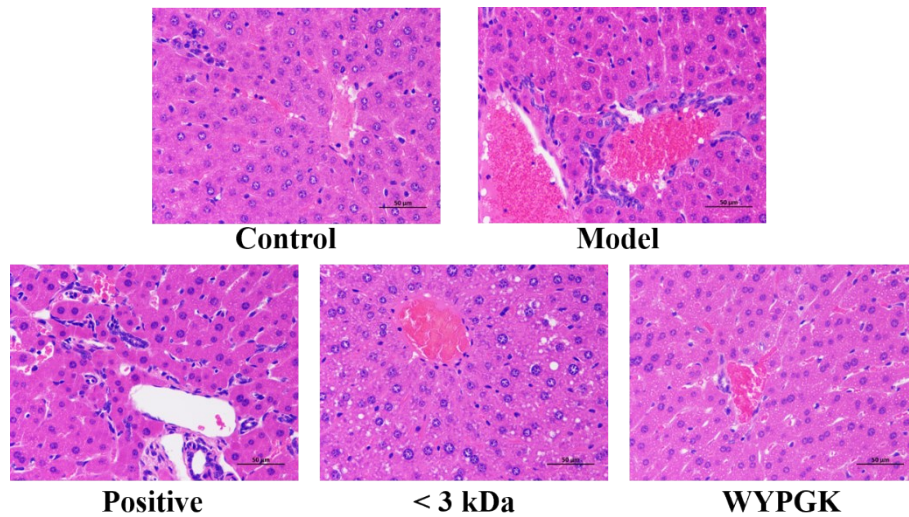

9  
10

(A)

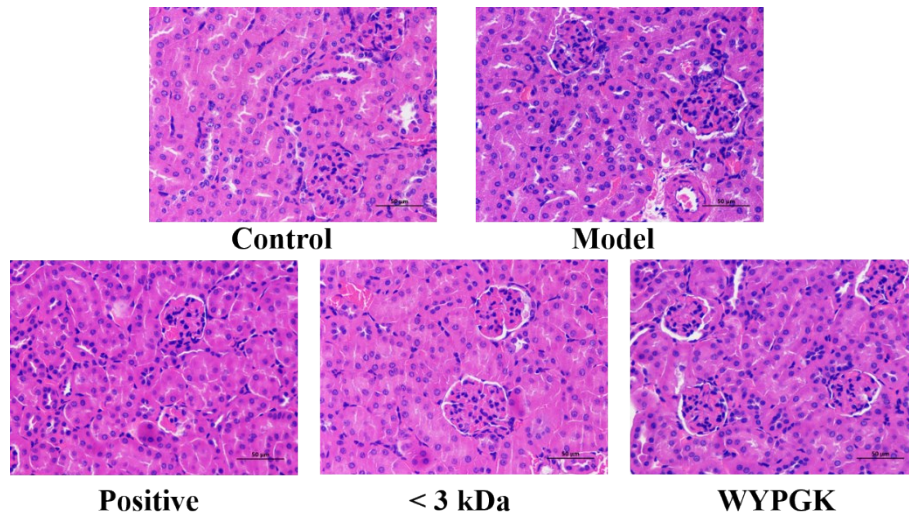

11  
12

(B)

13 **Figure S2.** H&E stained tissue slices (liver and kidney) of mice. No apparent  
 14 histopathological abnormalities can be observed in (A) liver and (B) kidney from mice  
 15 with fraction < 3 kDa and peptide WYPGK. The scale bar is 50 nm.

16
